# Supplementary material for: Long-term population persistence of flightless weevils (Eurhoptus pyriformis) across old- and second-growth forests patches in southern Appalachia
Source: BMC Evol Biol. 2018 Nov 9;18:165. doi: 10.1186/s12862-018-1278-y (PMC6234790; doi:10.1186/s12862-018-1278-y)
Supplement: Supplementary file 2 — All unique haplotypes/alleles (COI, CAD, KKV, and ITS2) and GenBank #s. (XLSX 53 kb) [file 12862_2018_1278_MOESM2_ESM.xlsx]

## Sheet: Sheet1
Gene	ExtractVoucher#	Haplotype/Allele	Species	Collection locality	GenBank #
CAD	SSM224	CAD_OG1	E. curtus	North Carolina: Jackson: Balsam Mountain Preserve, 35.398, -83.1088, BalsamMt,Dark ridge	MH040472
CAD	SSM388	CAD_OG2	E. curtus	North Carolina: Jackson: Balsam Mountain Preserve, 35.3681, -83.1036, Double top Mountain	MH040473
CAD	SSM500	CAD_OG4	E. curtus	Illinois: Alexander: Shawnee National Forest, 37.2894, -89.3427, nr. McClure	MH040475
CAD	SSM541	CAD_OG5	E. curtus	South Carolina: Greenville: Chestnut Ridge Heritage Preserve (DNR), 35.14062, -82.27904, Chestnut Ridge	MH040476
CAD	SSM548	CAD_OG6	E. curtus	South Carolina: McCormick: , 33.6893, -82.1603, Steven's Creek	MH040477
CAD	SSM493	CAD_OG3	E. enigmaticus	Alabama: Winston: 34.2975, -87.2697, Bankhead NF Brushy Crk Lake	MH040474
CAD	SSM089	CADp01	E. pyriformis	South Carolina: Greenville: Chestnut Ridge Heritage Preserve (DNR), 35.1523, -82.2814	MH040408
CAD	SSM089	CADp02	E. pyriformis	South Carolina: Greenville: Chestnut Ridge Heritage Preserve (DNR), 35.1523, -82.2814	MH040409
CAD	SSM093	CADp03	E. pyriformis	South Carolina: Greenville: Chestnut Ridge Heritage Preserve (DNR), 35.15013, -82.28203,	MH040410
CAD	SSM093	CADp04	E. pyriformis	South Carolina: Greenville: Chestnut Ridge Heritage Preserve (DNR), 35.15013, -82.28203,	MH040411
CAD	SSM157	CADp05	E. pyriformis	North Carolina: McDowell: Pisgah National Forest, 35.69054, -82.20547, Snooks Nose Trail	MH040412
CAD	SSM273	CADp06	E. pyriformis	North Carolina: McDowell: Pisgah National Forest, 35.72461, -82.18379, Mackey Mountain Trail	MH040413
CAD	SSM273	CADp07	E. pyriformis	North Carolina: McDowell: Pisgah National Forest, 35.72461, -82.18379, Mackey Mountain Trail	MH040414
CAD	SSM275	CADp08	E. pyriformis	North Carolina: McDowell: Pisgah National Forest, 35.72241, -82.17258, Mackey Mountain Trail	MH040415
CAD	SSM320	CADp09	E. pyriformis	North Carolina: McDowell: Pisgah National Forest, 35.69054, -82.20547, Snooks Nose Trail	MH040416
CAD	SSM321	CADp10	E. pyriformis	North Carolina: McDowell: Pisgah National Forest, 35.69054, -82.20547, Snooks Nose Trail	MH040417
CAD	SSM321	CADp11	E. pyriformis	North Carolina: McDowell: Pisgah National Forest, 35.69054, -82.20547, Snooks Nose Trail	MH040418
CAD	SSM357	CADp12	E. pyriformis	North Carolina: McDowell: Pisgah National Forest, 35.692894, -82.20703, Snooks Nose Trail	MH040419
CAD	SSM357	CADp13	E. pyriformis	North Carolina: McDowell: Pisgah National Forest, 35.692894, -82.20703, Snooks Nose Trail	MH040420
CAD	SSM359	CADp14	E. pyriformis	North Carolina: McDowell: Pisgah National Forest, 35.692894, -82.20703, Snooks Nose Trail	MH040421
CAD	SSM360	CADp15	E. pyriformis	North Carolina: McDowell: Pisgah National Forest, 35.692894, -82.20703, Snooks Nose Trail	MH040422
CAD	SSM360	CADp16	E. pyriformis	North Carolina: McDowell: Pisgah National Forest, 35.692894, -82.20703, Snooks Nose Trail	MH040423
CAD	SSM551	CADp18	E. pyriformis	North Carolina: Burke: Pisgah National Forest, 35.9403, -81.9297, Linville Gorge - Pine Gap Trail	MH040424
CAD	SSM551	CADp19	E. pyriformis	North Carolina: Burke: Pisgah National Forest, 35.9403, -81.9297, Linville Gorge - Pine Gap Trail	MH040425
CAD	SSM552	CADp20	E. pyriformis	North Carolina: Burke: Pisgah National Forest, 35.9403, -81.9297, Linville Gorge - Pine Gap Trail	MH040426
CAD	SSM552	CADp21	E. pyriformis	North Carolina: Burke: Pisgah National Forest, 35.9403, -81.9297, Linville Gorge - Pine Gap Trail	MH040427
CAD	SSM557	CADp24	E. pyriformis	North Carolina: Burke: Pisgah National Forest, 35.9331, -81.9282, Linville Gorge - Bynum Bluff Trail	MH040428
CAD	SSM553	CADp25	E. pyriformis	North Carolina: Burke: Pisgah National Forest, 35.9403, -81.9297, Linville Gorge - Pine Gap Trail	MH040429
CAD	SSM557	CADp22	E. pyriformis	North Carolina: Burke: Pisgah National Forest, 35.9331, -81.9282, Linville Gorge - Bynum Bluff Trail	MH040430
CAD	SSM028	CAD01	E. pyriformis	North Carolina: Graham: Nantahala National Forest, 35.34331, -83.96609, Joyce Kilmer Forest	MH040431
CAD	SSM028	CAD02	E. pyriformis	North Carolina: Graham: Nantahala National Forest, 35.34331, -83.96609, Joyce Kilmer Forest	MH040432
CAD	SSM044	CAD03	E. pyriformis	North Carolina: Cherokee: Nantahala National Forest, 35.21763, -83.70553, Hickory Branch trail	MH040433
CAD	SSM044	CAD04	E. pyriformis	North Carolina: Cherokee: Nantahala National Forest, 35.21763, -83.70553, Hickory Branch trail	MH040434
CAD	SSM046	CAD05	E. pyriformis	North Carolina: Cherokee: Nantahala National Forest, 35.21763, -83.70553, Hickory Branch trail	MH040435
CAD	SSM048	CAD06	E. pyriformis	North Carolina: Cherokee: Nantahala National Forest, 35.21793, -83.70615, London Bald Trail	MH040436
CAD	SSM048	CAD07	E. pyriformis	North Carolina: Cherokee: Nantahala National Forest, 35.21793, -83.70615, London Bald Trail	MH040437
CAD	SSM049	CAD08	E. pyriformis	North Carolina: Cherokee: Nantahala National Forest, 35.21793, -83.70615, London Bald Trail	MH040438
CAD	SSM049	CAD09	E. pyriformis	North Carolina: Cherokee: Nantahala National Forest, 35.21793, -83.70615, London Bald Trail	MH040439
CAD	SSM075	CAD10	E. pyriformis	South Carolina: Pickens: 35.06454, -82.77745, Sassafras Mountain summit	MH040440
CAD	SSM082	CAD11	E. pyriformis	South Carolina: Pickens: 35.06454, -82.77745, Sassafras Mountain summit	MH040441
CAD	SSM159	CAD12	E. pyriformis	North Carolina: Macon: Nantahala National Forest, 35.08405, -83.29764, Jones Knob	MH040442
CAD	SSM176	CAD13	E. pyriformis	North Carolina: Macon: Nantahala National Forest, 35.07853, -83.29229, Jones Knob	MH040443
CAD	SSM227	CAD14	E. pyriformis	North Carolina: Jackson: Balsam Mountain Preserve, 35.398, -83.1088, BalsamMt,Dark ridge	MH040444
CAD	SSM257	CAD15	E. pyriformis	North Carolina: Macon: Nantahala National Forest, 35.00959, -83.12448, Ellicott rock trail	MH040445
CAD	SSM257	CAD16	E. pyriformis	North Carolina: Macon: Nantahala National Forest, 35.00959, -83.12448, Ellicott rock trail	MH040446
CAD	SSM261	CAD17	E. pyriformis	South Carolina: Oconee: Sumter National Forest, 34.99032, -83.07233, Ellicott Rock Wilderness, Indian Camp Creek	MH040447
CAD	SSM267	CAD18	E. pyriformis	North Carolina: McDowell: Pisgah National Forest, 35.27274, -82.89323, Courthouse Falls	MH040448
CAD	SSM267	CAD19	E. pyriformis	North Carolina: McDowell: Pisgah National Forest, 35.27274, -82.89323, Courthouse Falls	MH040449
CAD	SSM270	CAD20	E. pyriformis	North Carolina: McDowell: Pisgah National Forest, 35.27274, -82.89323, Courthouse Falls	MH040450
CAD	SSM390	CAD21	E. pyriformis	North Carolina: Cherokee: Nantahala National Forest, 35.22306, -83.70107, London Bald Trail	MH040451
CAD	SSM390	CAD22	E. pyriformis	North Carolina: Cherokee: Nantahala National Forest, 35.22306, -83.70107, London Bald Trail	MH040452
CAD	SSM391	CAD23	E. pyriformis	North Carolina: Cherokee: Nantahala National Forest, 35.22306, -83.70107, London Bald Trail	MH040453
CAD	SSM391	CAD24	E. pyriformis	North Carolina: Cherokee: Nantahala National Forest, 35.22306, -83.70107, London Bald Trail	MH040454
CAD	SSM394	CAD25	E. pyriformis	North Carolina: Macon: Nantahala National Forest, 35.08405, -83.29764, Jones Knob	MH040455
CAD	SSM394	CAD26	E. pyriformis	North Carolina: Macon: Nantahala National Forest, 35.08405, -83.29764, Jones Knob	MH040456
CAD	SSM395	CAD27	E. pyriformis	North Carolina: Macon: Nantahala National Forest, 35.08405, -83.29764, Jones Knob	MH040457
CAD	SSM398	CAD28	E. pyriformis	South Carolina: Pickens: Eastatoe Creek Heritage Preserve (DNR), 35.04032, -82.81435, Eastatoe Creek Heritage Preserve trail	MH040458
CAD	SSM399	CAD29	E. pyriformis	South Carolina: Pickens: Eastatoe Creek Heritage Preserve (DNR), 35.04032, -82.81435, Eastatoe Creek Heritage Preserve trail	MH040459
CAD	SSM399	CAD30	E. pyriformis	South Carolina: Pickens: Eastatoe Creek Heritage Preserve (DNR), 35.04032, -82.81435, Eastatoe Creek Heritage Preserve trail	MH040460
CAD	SSM400	CAD31	E. pyriformis	South Carolina: Pickens: Eastatoe Creek Heritage Preserve (DNR), 35.04032, -82.81435, Eastatoe Creek Heritage Preserve trail	MH040461
CAD	SSM400	CAD32	E. pyriformis	South Carolina: Pickens: Eastatoe Creek Heritage Preserve (DNR), 35.04032, -82.81435, Eastatoe Creek Heritage Preserve trail	MH040462
CAD	SSM457	CAD33	E. pyriformis	North Carolina: Macon: Nantahala National Forest, 35.0697, -83.2825, Hickory Gap	MH040463
CAD	SSM457	CAD34	E. pyriformis	North Carolina: Macon: Nantahala National Forest, 35.0697, -83.2825, Hickory Gap	MH040464
CAD	SSM458	CAD35	E. pyriformis	North Carolina: Transylvania: Pisgah National Forest, 35.2871, -82.908, Blue ridge parkway- Tanasee Bald	MH040465
CAD	SSM461	CAD36	E. pyriformis	North Carolina: Macon: Ellicott Rock Wilderness, 35.00959, -83.12448, Ellicott Rock	MH040466
CAD	SSM461	CAD37	E. pyriformis	North Carolina: Macon: Ellicott Rock Wilderness, 35.00959, -83.12448, Ellicott Rock	MH040467
CAD	SSM464	CAD38	E. pyriformis	South Carolina: Oconee: Sumter National Forest, 34.98376, -83.09788, Ellicott Rock Wilderness	MH040468
CAD	SSM465	CAD39	E. pyriformis	South Carolina: Oconee: Coon Branch Natural Area, 35.0269, -83.0057, Coon Branch Natural Area	MH040469
CAD	SSM543	CAD40	E. pyriformis	North Carolina: Jackson: Balsam Mountain Preserve, 35.3772, -83.0921, Double top Mountain	MH040470
CAD	SSM543	CAD41	E. pyriformis	North Carolina: Jackson: Balsam Mountain Preserve, 35.3772, -83.0921, Double top Mountain	MH040471
COI	SSM496	COI_OG3	Acalles clavatus	Texas: Sabine: Hemphill Sabine National Forest, 31.3849, -93.7084, 0.5 mi. N. Gomer Rd.	MH040393
COI	SSM498	COI_OG7	Acalles porosus	Illinois: St. Claire: , 38.5495, -89.7633, rest stop nr. New Baden	MH040394
COI	SSM499	COI_OG8	Acalles porosus	Illinois: St. Claire: , 38.5495, -89.7633, rest stop nr. New Baden	MH040395
COI	SSM178	COI_OG9	E. curtus	North Carolina: Macon: Nantahala National Forest, 35.07853, -83.29229, Jones Knob	MH040362
COI	SSM222	COI_40	E. curtus	North Carolina: Jackson: Balsam Mountain Preserve, 35.3653, -83.1062, Double top Mountain	MH040363
COI	SSM223	COI_42	E. curtus	North Carolina: Jackson: Balsam Mountain Preserve, 35.3681, -83.1036, Double top Mountain	MH040364
COI	SSM326	COI_53	E. curtus	North Carolina: Buncombe: Pisgah National Forest, 35.80174, -82.3401, Big Butt Trail	MH040373
COI	SSM386	COI_51	E. curtus	North Carolina: Jackson: Balsam Mountain Preserve, 35.372, -83.0998, Double top Mountain	MH040378
COI	SSM397	COI_43	E. curtus	South Carolina: Pickens: Eastatoe Creek Heritage Preserve (DNR), 35.04032, -82.81435, Eastatoe Creek Heritage Preserve trail	MH040383
COI	SSM500	COI_OG2	E. curtus	Illinois: Alexander: Shawnee National Forest, 37.2894, -89.3427, nr. McClure	MH040396
COI	SSM511	COI_OG4	E. curtus	Indiana: Floyd: , 38.2775, -84.9626, rest stop nr. Georgetown	MH040398
COI	SSM538	COI_44b	E. curtus	South Carolina: Greenville: Chestnut Ridge Heritage Preserve (DNR), 35.14062, -82.27904, Chestnut Ridge Heritage Preserve (DNR)	MH040399
COI	SSM540	COI_49	E. curtus	South Carolina: Greenville: Chestnut Ridge Heritage Preserve (DNR), 35.14062, -82.27904, Chestnut Ridge	MH040400
COI	SSM541	COI_46	E. curtus	South Carolina: Greenville: Chestnut Ridge Heritage Preserve (DNR), 35.14062, -82.27904, Chestnut Ridge	MH040401
COI	SSM546	COI_41	E. curtus	North Carolina: Jackson: Balsam Mountain Preserve, 35.3699, -83.1212, Sugarloaf Mountain	MH040404
COI	MSC2521	COI_63	E. curtus	TN: Marion Co., Tennessee River Gorge, Pot Point	MH628656
COI	SSM493	COI_OG1	E. enigmaticus	Alabama: Winston: , 34.2975, -87.2697, Bankhead NF Brushy Crk Lake	MH040392
COI	SSM017	COI_02	E. pyriformis	North Carolina: Graham: Nantahala National Forest, 35.34501, -83.96703, Joyce Kilmer Forest	MH040342
COI	SSM020	COI_27	E. pyriformis	North Carolina: Graham: Nantahala National Forest, 35.34854, -83.977, Joyce Kilmer Forest	MH040343
COI	SSM028	COI_25	E. pyriformis	North Carolina: Graham: Nantahala National Forest, 35.34331, -83.96609, Joyce Kilmer Forest	MH040344
COI	SSM043	COI_04	E. pyriformis	North Carolina: Cherokee: Nantahala National Forest, 35.21763, -83.70553, Hickory Branch trail	MH040345
COI	SSM044	COI_19	E. pyriformis	North Carolina: Cherokee: Nantahala National Forest, 35.21763, -83.70553, Hickory Branch trail	MH040346
COI	SSM048	COI_18	E. pyriformis	North Carolina: Cherokee: Nantahala National Forest, 35.21793, -83.70615, London Bald Trail	MH040347
COI	SSM049	COI_05	E. pyriformis	North Carolina: Cherokee: Nantahala National Forest, 35.21793, -83.70615, London Bald Trail	MH040348
COI	SSM050	COI_34	E. pyriformis	North Carolina: Cherokee: Nantahala National Forest, 35.21793, -83.70615, London Bald Trail	MH040349
COI	SSM075	COI_06	E. pyriformis	South Carolina: Pickens: 35.06454, -82.77745, Sassafras Mountain summit	MH040350
COI	SSM078	COI_38	E. pyriformis	South Carolina: Pickens: 35.06454, -82.77745, Sassafras Mountain summit	MH040351
COI	SSM089	COI_23	E. pyriformis	South Carolina: Greenville: Chestnut Ridge Heritage Preserve (DNR), 35.1523, -82.2814,	MH040352
COI	SSM091	COI_44	E. pyriformis	South Carolina: Greenville: Chestnut Ridge Heritage Preserve (DNR), 35.1523, -82.2814, Chestnut Ridge Heritage Preserve (DNR)	MH040353
COI	SSM093	COI_24	E. pyriformis	South Carolina: Greenville: Chestnut Ridge Heritage Preserve (DNR), 35.15013, -82.28203,	MH040354
COI	SSM095	COI_50	E. pyriformis	South Carolina: Greenville: Chestnut Ridge Heritage Preserve (DNR), 35.14062, -82.27904, Chestnut Ridge Heritage Preserve (DNR)	MH040355
COI	SSM096	COI_22	E. pyriformis	South Carolina: Greenville: Chestnut Ridge Heritage Preserve (DNR), 35.14062, -82.27904,	MH040356
COI	SSM111	COI_52	E. pyriformis	South Carolina: Greenville: Chestnut Ridge Heritage Preserve (DNR), 35.1518, -82.2839, Chestnut Ridge Heritage Preserve (DNR)	MH040357
COI	SSM157	COI_20	E. pyriformis	North Carolina: McDowell: Pisgah National Forest, 35.69054, -82.20547, Snooks Nose Trail	MH040358
COI	SSM158	COI_17	E. pyriformis	North Carolina: McDowell: Pisgah National Forest, 35.69054, -82.20547, Snooks Nose Trail	MH040359
COI	SSM159	COI_01	E. pyriformis	North Carolina: Macon: Nantahala National Forest, 35.08405, -83.29764, Jones Knob	MH040360
COI	SSM176	COI_30	E. pyriformis	North Carolina: Macon: Nantahala National Forest, 35.07853, -83.29229, Jones Knob	MH040361
COI	SSM227	COI_11	E. pyriformis	North Carolina: Jackson: Balsam Mountain Preserve, 35.398, -83.1088, BalsamMt,Dark ridge	MH040365
COI	SSM257	COI_09	E. pyriformis	North Carolina: Macon: Nantahala National Forest, 35.00959, -83.12448, Ellicott rock trail	MH040366
COI	SSM261	COI_12	E. pyriformis	South Carolina: Oconee: Sumter National Forest, 34.99032, -83.07233, Ellicott Rock Wilderness, Indian Camp Creek	MH040367
COI	SSM267	COI_07	E. pyriformis	North Carolina: McDowell: Pisgah National Forest, 35.27274, -82.89323, Courthouse Falls	MH040368
COI	SSM270b	COI_28	E. pyriformis	North Carolina: McDowell: Pisgah National Forest, 35.27274, -82.89323, Courthouse Falls	MH040369
COI	SSM272	COI_08	E. pyriformis	North Carolina: McDowell: Pisgah National Forest, 35.27471, -82.8902, Courthouse Falls	MH040370
COI	SSM273	COI_16	E. pyriformis	North Carolina: McDowell: Pisgah National Forest, 35.72461, -82.18379, Mackey Mountain Trail	MH040371
COI	SSM303	COI_26	E. pyriformis	North Carolina: Graham: Nantahala National Forest, 35.34413, -83.96605, Joyce Kilmer Forest	MH040372
COI	SSM340	COI_32	E. pyriformis	North Carolina: Macon: Nantahala National Forest, 35.07517, -83.2883, Jones Gap	MH040374
COI	SSM357	COI_15	E. pyriformis	North Carolina: McDowell: Pisgah National Forest, 35.692894, -82.20703, Snooks Nose Trail	MH040375
COI	SSM360	COI_21	E. pyriformis	North Carolina: McDowell: Pisgah National Forest, 35.692894, -82.20703, Snooks Nose Trail	MH040376
COI	SSM366	COI_48	E. pyriformis	North Carolina: Burke: Pisgah National Forest, 35.924149, -81.913177, Linville Gorge: Babel Tower Trail	MH040377
COI	SSM390	COI_33	E. pyriformis	North Carolina: Cherokee: Nantahala National Forest, 35.22306, -83.70107, London Bald Trail	MH040379
COI	SSM391	COI_35	E. pyriformis	North Carolina: Cherokee: Nantahala National Forest, 35.22306, -83.70107, London Bald Trail	MH040380
COI	SSM394	COI_29	E. pyriformis	North Carolina: Macon: Nantahala National Forest, 35.08405, -83.29764, Jones Knob	MH040381
COI	SSM395	COI_31	E. pyriformis	North Carolina: Macon: Nantahala National Forest, 35.08405, -83.29764, Jones Knob	MH040382
COI	SSM398	COI_39	E. pyriformis	South Carolina: Pickens: Eastatoe Creek Heritage Preserve (DNR), 35.04032, -82.81435, Eastatoe Creek Heritage Preserve trail	MH040384
COI	SSM399	COI_37	E. pyriformis	South Carolina: Pickens: Eastatoe Creek Heritage Preserve (DNR), 35.04032, -82.81435, Eastatoe Creek Heritage Preserve trail	MH040385
COI	SSM400	COI_36	E. pyriformis	South Carolina: Pickens: Eastatoe Creek Heritage Preserve (DNR), 35.04032, -82.81435, Eastatoe Creek Heritage Preserve trail	MH040386
COI	SSM450	COI_03	E. pyriformis	North Carolina: Jackson: Sumter National Forest, 35.00203, -83.10708, Ellicott Rock Wilderness, Bad Creek trail	MH040387
COI	SSM461	COI_10	E. pyriformis	North Carolina: Macon: Ellicott Rock Wilderness, 35.00959, -83.12448, Ellicott Rock	MH040388
COI	SSM465	COI_13	E. pyriformis	South Carolina: Oconee: Coon Branch Natural Area, 35.0269, -83.0057, Coon Branch Natural Area	MH040389
COI	SSM466	COI_14	E. pyriformis	South Carolina: Oconee: Coon Branch Natural Area, 35.0272, -83.0069, Coon Branch Natural Area	MH040390
COI	SSM543	COI_47	E. pyriformis	North Carolina: Jackson: Balsam Mountain Preserve, 35.3772, -83.0921, Double top Mountain	MH040402
COI	SSM544	COI_45	E. pyriformis	North Carolina: Jackson: Balsam Mountain Preserve, 35.3772, -83.0921, Double top Mountain	MH040403
COI	SSM552	COI_54	E. pyriformis	North Carolina: Burke: Pisgah National Forest, 35.9403, -81.9297, Linville Gorge - Pine Gap Trail	MH040405
COI	SSM553	COI_55	E. pyriformis	North Carolina: Burke: Pisgah National Forest, 35.9403, -81.9297, Linville Gorge - Pine Gap Trail	MH040406
COI	SSM555	COI_56	E. pyriformis	North Carolina: Burke: Pisgah National Forest, 35.9331, -81.9282, Linville Gorge - Bynum Bluff Trail	MH040407
COI	MSC2483	COI_59	E. pyriformis	South Carolina: Darlington Co., Great Pee-Dee River Preserve	MH628652
COI	MSC2484	COI_60	E. pyriformis	South Carolina: Darlington Co., Great Pee-Dee River Preserve	MH628653
COI	MSC2514	COI_61	E. pyriformis	Indiana: Tippecanoe Co.	MH628654
COI	MSC2520	COI_62	E. pyriformis	Georgia: Walker Co., Lula Lake	MH628655
COI	MSC2522	COI_64	E. pyriformis	South Carolina: Oconee Co., Riley Moore Falls	MH628657
COI	MSC2524	COI_65	E. pyriformis	Arkansas: Logan Co., Mt. Magazine State Park	MH628658
COI	SSM491	COI_OG5	E. sordidus	Arkansas: Montgomery: Ouachita National Forest, 34.3808, -94.0273,	MH040391
COI	SSM502	COI_OG6	Peracalles pectoralis	Illinois: Alexander: Shawnee National Forest, 37.2894, -89.3427, nr. McClure	MH040397
ITS2	SSM495	ITS50	Acalles clavatus	Texas: Sabine: Hemphill Sabine National Forest, 31.3849, -93.7084, 0.5 mi. N. Gomer Rd.	MH023476
ITS2	SSM498	ITS52	Acalles porosus	Illinois: St. Claire: 38.5495, -89.7633, rest stop nr. New Baden	MH023478
ITS2	SSM091	ITS11	E. curtus	South Carolina: Greenville: Chestnut Ridge Heritage Preserve (DNR), 35.1523, -82.2814	MH023437
ITS2	SSM178	ITS16	E. curtus	North Carolina: Macon: Nantahala National Forest, 35.07853, -83.29229, Jones Knob	MH023442
ITS2	SSM222	ITS17	E. curtus	North Carolina: Jackson: Balsam Mountain Preserve, 35.3653, -83.1062, Double top Mountain	MH023443
ITS2	SSM388	ITS31	E. curtus	North Carolina: Jackson: Balsam Mountain Preserve, 35.3681, -83.1036, Double top Mountain	MH023457
ITS2	SSM508	ITS56	E. curtus	Kentucky: Lee: 37.6607, -83.6966, 2 km S. Zoe	MH023482
ITS2	SSM509	ITS57	E. curtus	Kentucky: Whitley: 36.6144, -84.1047, I-75 Welcome Center	MH023483
ITS2	SSM510	ITS58	E. curtus	Indiana: Floyd: 38.2775, -84.9626, rest stop nr. Georgetown	MH023484
ITS2	SSM511	ITS59	E. curtus	Indiana: Floyd: 38.2775, -84.9626, rest stop nr. Georgetown	MH023485
ITS2	SSM540	ITS61	E. curtus	South Carolina: Greenville: Chestnut Ridge Heritage Preserve (DNR), 35.14062, -82.27904, Chestnut Ridge	MH023487
ITS2	SSM541	ITS62	E. curtus	South Carolina: Greenville: Chestnut Ridge Heritage Preserve (DNR), 35.14062, -82.27904, Chestnut Ridge	MH023488
ITS2	SSM545	ITS64	E. curtus	North Carolina: Jackson: Balsam Mountain Preserve, 35.37, -83.1216, Sugarloaf Mountain	MH023490
ITS2	SSM547	ITS65	E. curtus	North Carolina: Jackson: Balsam Mountain Preserve, 35.3691, -83.1191, Sugarloaf Mountain	MH023491
ITS2	SSM548	ITS66	E. curtus	South Carolina: McCormick: Steven's Creek Heritage Preserve, 33.6893, -82.1603, Steven's Creek	MH023492
ITS2	SSM549	ITS67	E. curtus	South Carolina: McCormick: Steven's Creek Heritage Preserve, 33.6893, -82.1603, Steven's Creek	MH023493
ITS2	MSC2477	ITS69	E. curtus	USA: IN:PioneerMothersSP	MH638626
ITS2	MSC2478	ITS70	E. curtus	USA: IN:PioneerMothersSP	MH638627
ITS2	MSC2479	ITS71	E. curtus	USA: IN:CrawfordCo., HemlockCliffsTr.	MH638628
ITS2	MSC2511	ITS72	E. curtus	WV: Pendleton Co., High Knob Trail	MH638629
ITS2	SSM503	ITS55	E. enigmaticus	Illinois: Alexander: Shawnee NF, 37.2894, -89.3427, nr. McClure	MH023481
ITS2	SSM025	ITS01	E. pyriformis	North Carolina: Graham: Nantahala National Forest, 35.34501, -83.96703, Joyce Kilmer Forest	MH023427
ITS2	SSM028	ITS02	E. pyriformis	North Carolina: Graham: Nantahala National Forest, 35.34331, -83.96609, Joyce Kilmer Forest	MH023428
ITS2	SSM043	ITS03	E. pyriformis	North Carolina: Cherokee: Nantahala National Forest, 35.21763, -83.70553, Hickory Branch trail	MH023429
ITS2	SSM044	ITS04	E. pyriformis	North Carolina: Cherokee: Nantahala National Forest, 35.21763, -83.70553, Hickory Branch trail	MH023430
ITS2	SSM048	ITS05	E. pyriformis	North Carolina: Cherokee: Nantahala National Forest, 35.21793, -83.70615, London Bald Trail	MH023431
ITS2	SSM049	ITS06	E. pyriformis	North Carolina: Cherokee: Nantahala National Forest, 35.21793, -83.70615, London Bald Trail	MH023432
ITS2	SSM046	ITS07	E. pyriformis	North Carolina: Cherokee: Nantahala National Forest, 35.21763, -83.70553, Hickory Branch trail	MH023433
ITS2	SSM075	ITS08	E. pyriformis	South Carolina: Pickens: 35.06454, -82.77745, Sassafras Mountain summit	MH023434
ITS2	SSM078	ITS09	E. pyriformis	South Carolina: Pickens: 35.06454, -82.77745, Sassafras Mountain summit	MH023435
ITS2	SSM089	ITS10	E. pyriformis	South Carolina: Greenville: Chestnut Ridge Heritage Preserve (DNR), 35.1523, -82.2814	MH023436
ITS2	SSM096	ITS12	E. pyriformis	South Carolina: Greenville: Chestnut Ridge Heritage Preserve (DNR), 35.14062, -82.27904	MH023438
ITS2	SSM157	ITS13	E. pyriformis	North Carolina: McDowell: Pisgah National Forest, 35.69054, -82.20547, Snooks Nose Trail	MH023439
ITS2	SSM159	ITS14	E. pyriformis	North Carolina: Macon: Nantahala National Forest, 35.08405, -83.29764, Jones Knob	MH023440
ITS2	SSM176	ITS15	E. pyriformis	North Carolina: Macon: Nantahala National Forest, 35.07853, -83.29229, Jones Knob	MH023441
ITS2	SSM227	ITS18	E. pyriformis	North Carolina: Jackson: Balsam Mountain Preserve, 35.398, -83.1088, BalsamMt, Dark ridge	MH023444
ITS2	SSM257	ITS19	E. pyriformis	North Carolina: Macon: Nantahala National Forest, 35.00959, -83.12448, Ellicott rock trail	MH023445
ITS2	SSM261	ITS20	E. pyriformis	South Carolina: Oconee: Sumter National Forest, 34.99032, -83.07233, Ellicott Rock Wilderness, Indian Camp Creek	MH023446
ITS2	SSM267	ITS21	E. pyriformis	North Carolina: McDowell: Pisgah National Forest, 35.27274, -82.89323, Courthouse Falls	MH023447
ITS2	SSM270b	ITS22	E. pyriformis	North Carolina: McDowell: Pisgah National Forest, 35.27274, -82.89323, Courthouse Falls	MH023448
ITS2	SSM272	ITS23	E. pyriformis	North Carolina: McDowell: Pisgah National Forest, 35.27471, -82.8902, Courthouse Falls	MH023449
ITS2	SSM273	ITS24	E. pyriformis	North Carolina: McDowell: Pisgah National Forest, 35.72461, -82.18379, Mackey Mountain Trail	MH023450
ITS2	SSM303	ITS25	E. pyriformis	North Carolina: Graham: Nantahala National Forest, 35.34413, -83.96605, Joyce Kilmer Forest	MH023451
ITS2	SSM305	ITS26	E. pyriformis	North Carolina: Graham: Nantahala National Forest, 35.34258, -83.96596, Joyce Kilmer Forest	MH023452
ITS2	SSM321	ITS27	E. pyriformis	North Carolina: McDowell: Pisgah National Forest, 35.69054, -82.20547, Snooks Nose Trail	MH023453
ITS2	SSM359	ITS28	E. pyriformis	North Carolina: McDowell: Pisgah National Forest, 35.692894, -82.20703, Snooks Nose Trail	MH023454
ITS2	SSM360	ITS29	E. pyriformis	North Carolina: McDowell: Pisgah National Forest, 35.692894, -82.20703, Snooks Nose Trail	MH023455
ITS2	SSM366	ITS30	E. pyriformis	North Carolina: Burke: Pisgah National Forest, 35.924149, -81.913177, Linville Gorge: Babel Tower Trail	MH023456
ITS2	SSM390	ITS32	E. pyriformis	North Carolina: Cherokee: Nantahala National Forest, 35.22306, -83.70107, London Bald Trail	MH023458
ITS2	SSM391	ITS33	E. pyriformis	North Carolina: Cherokee: Nantahala National Forest, 35.22306, -83.70107, London Bald Trail	MH023459
ITS2	SSM392	ITS34	E. pyriformis	North Carolina: Cherokee: Nantahala National Forest, 35.22306, -83.70107, London Bald Trail	MH023460
ITS2	SSM275	ITS35	E. pyriformis	North Carolina: McDowell: Pisgah National Forest, 35.72241, -82.17258, Mackey Mountain Trail	MH023461
ITS2	SSM395	ITS36	E. pyriformis	North Carolina: Macon: Nantahala National Forest, 35.08405, -83.29764, Jones Knob	MH023462
ITS2	SSM398	ITS37	E. pyriformis	South Carolina: Pickens: Eastatoe Creek Heritage Preserve, 35.04032, -82.81435, Eastatoe Creek Heritage Preserve trail	MH023463
ITS2	SSM399	ITS38	E. pyriformis	South Carolina: Pickens: Eastatoe Creek Heritage Preserve, 35.04032, -82.81435, Eastatoe Creek Heritage Preserve trail	MH023464
ITS2	SSM400	ITS39	E. pyriformis	South Carolina: Pickens: Eastatoe Creek Heritage Preserve, 35.04032, -82.81435, Eastatoe Creek Heritage Preserve trail	MH023465
ITS2	SSM450	ITS40	E. pyriformis	North Carolina: Jackson: Sumter National Forest, 35.00203, -83.10708, Ellicott Rock Wilderness, Bad Creek trail	MH023466
ITS2	SSM458	ITS41	E. pyriformis	North Carolina: Transylvania: Pisgah National Forest, 35.2871, -82.908, Blue ridge parkway- Tanasee Bald	MH023467
ITS2	SSM461	ITS42	E. pyriformis	North Carolina: Macoon: Ellicott Rock, 35.00959, -83.12448, Ellicott Rock	MH023468
ITS2	SSM464	ITS43	E. pyriformis	South Carolina: oconee: east fork, 34.98376, -83.09788, Ellicott Rock Wilderness	MH023469
ITS2	SSM465	ITS44	E. pyriformis	South Carolina: Oconee: Coon Branch Natural Area, 35.0269, -83.0057, Coon Branch Natural Area	MH023470
ITS2	SSM466	ITS45	E. pyriformis	South Carolina: Oconee: Coon Branch Natural Area, 35.0272, -83.0069, Coon Branch Natural Area	MH023471
ITS2	SSM468	ITS46	E. pyriformis	North Carolina: Swain: 35.4825, -83.378, Cooper's Creek	MH023472
ITS2	SSM539	ITS60	E. pyriformis	South Carolina: Greenville: Chestnut Ridge Heritage Preserve (DNR), 35.14062, -82.27904, Chestnut Ridge Heritage Preserve (DNR)	MH023486
ITS2	SSM544	ITS63	E. pyriformis	North Carolina: Jackson: Balsam Mountain Preserve, 35.3772, -83.0921, Double top Mountain	MH023489
ITS2	SSM555	ITS68	E. pyriformis	North Carolina: Burke: Pisgah National Forest, 35.9331 -81.9282 Linville Gorge, Bynum Bluff Trail	MH023494
ITS2	SSM477	ITS47	E. sordidus	Arkansas: Montogmery: Quachita National Forest, 34.3808, -94.0273	MH023473
ITS2	SSM480	ITS48	E. sordidus	Texas: Sabine: Hemphill Sabine National Forest, 31.3849, -93.7084, 0.5 mi. N. Gomer Rd.	MH023474
ITS2	SSM481	ITS49	E. sordidus	Texas: Sabine: Hemphill Sabine National Forest, 31.3849, -93.7084, 0.5 mi. N. Gomer Rd.	MH023475
ITS2	SSM497	ITS51	E. sordidus	Texas: Sabine: Hemphill Sabine National Forest, 31.3849, -93.7084, 0.5 mi. N. Gomer Rd.	MH023477
ITS2	SSM501	ITS53	Peracalles pectoralis	Illinois: Alexander: Shawnee NF, 37.2894, -89.3427, nr. McClure	MH023479
ITS2	SSM502	ITS54	Peracalles pectoralis	Illinois: Alexander: Shawnee NF, 37.2894, -89.3427, nr. McClure	MH023480
KKV	SSM495	KKV52	Acalles clavatus	Texas: Sabine: Hemphill Sabine National Forest, 31.3849, -93.7084, 0.5 mi. N. Gomer Rd.	MH040529
KKV	SSM499	KKV53	Acalles porosus	Illinois: St. Claire: , 38.5495, -89.7633, rest stop nr. New Baden	MH040530
KKV	SSM178	KKV29	E. curtus	North Carolina: Macon: Nantahala National Forest, 35.07853, -83.29229, Jones Knob	MH040506
KKV	SSM178	KKV30	E. curtus	North Carolina: Macon: Nantahala National Forest, 35.07853, -83.29229, Jones Knob	MH040507
KKV	SSM397	KKV31	E. curtus	South Carolina: Pickens: Eastatoe Creek Heritage Preserve (DNR), 35.04032, -82.81435, Eastatoe Creek Heritage Preserve trail	MH040508
KKV	SSM397	KKV32	E. curtus	South Carolina: Pickens: Eastatoe Creek Heritage Preserve (DNR), 35.04032, -82.81435, Eastatoe Creek Heritage Preserve trail	MH040509
KKV	SSM500	KKV35	E. curtus	Illinois: Alexander: Shawnee NF, 37.2894, -89.3427, nr. McClure	MH040512
KKV	SSM500	KKV36	E. curtus	Illinois: Alexander: Shawnee NF, 37.2894, -89.3427, nr. McClure	MH040513
KKV	SSM508	KKV39	E. curtus	Kentucky: Lee: , 37.6607, -83.6966, 2 km S. Zoe	MH040516
KKV	SSM509	KKV40	E. curtus	Kentucky: Whitley: , 36.6144, -84.1047, I-75 Welcome Center	MH040517
KKV	SSM511	KKV41	E. curtus	Indiana: Floyd: , 38.2775, -84.9626, rest stop nr. Georgetown	MH040518
KKV	SSM540	KKV42	E. curtus	South Carolina: Greenville: Chestnut Ridge Heritage Preserve (DNR), 35.14062, -82.27904, Chestnut Ridge	MH040519
KKV	SSM540	KKV43	E. curtus	South Carolina: Greenville: Chestnut Ridge Heritage Preserve (DNR), 35.14062, -82.27904, Chestnut Ridge	MH040520
KKV	SSM541	KKV44	E. curtus	South Carolina: Greenville: Chestnut Ridge Heritage Preserve (DNR), 35.14062, -82.27904, Chestnut Ridge	MH040521
KKV	SSM547	KKV45	E. curtus	North Carolina: Jackson: Balsam Mountain Preserve, 35.3691, -83.1191, Sugarloaf Mountain	MH040522
KKV	SSM547	KKV46	E. curtus	North Carolina: Jackson: Balsam Mountain Preserve, 35.3691, -83.1191, Sugarloaf Mountain	MH040523
KKV	SSM548	KKV47	E. curtus	South Carolina: McCormick: Steven's Creek Heritage Preserve, 33.6893, -82.1603, Steven's Creek	MH040524
KKV	SSM548	KKV48	E. curtus	South Carolina: McCormick: Steven's Creek Heritage Preserve, 33.6893, -82.1603, Steven's Creek	MH040525
KKV	MSC2479	KKV56	E. curtus	USA: IN:CrawfordCo., HemlockCliffsTr.	MH628659
KKV	MSC2521	KKV59	E. curtus	TN: Marion Co., Tennessee River Gorge, Pot Point	MH628662
KKV	SSM478	KKV33	E. enigmaticus	Alabama: Winston: , 34.2975, -87.2697, Bankhead NF Brushy Crk Lake	MH040510
KKV	SSM479	KKV34	E. enigmaticus	Alabama: Winston: , 34.2975, -87.2697, Bankhead NF Brushy Crk Lake	MH040511
KKV	SSM503	KKV37	E. enigmaticus	Illinois: Alexander: Shawnee NF, 37.2894, -89.3427, nr. McClure	MH040514
KKV	SSM503	KKV38	E. enigmaticus	Illinois: Alexander: Shawnee NF, 37.2894, -89.3427, nr. McClure	MH040515
KKV	SSM043	KKV01	E. pyriformis	North Carolina: Cherokee: Nantahala National Forest, 35.21763, -83.70553, Hickory Branch trail	MH040478
KKV	SSM044	KKV02	E. pyriformis	North Carolina: Cherokee: Nantahala National Forest, 35.21763, -83.70553, Hickory Branch trail	MH040479
KKV	SSM050	KKV03	E. pyriformis	North Carolina: Cherokee: Nantahala National Forest, 35.21793, -83.70615, London Bald Trail	MH040480
KKV	SSM050	KKV04	E. pyriformis	North Carolina: Cherokee: Nantahala National Forest, 35.21793, -83.70615, London Bald Trail	MH040481
KKV	SSM075	KKV05	E. pyriformis	South Carolina: Pickens: 35.06454, -82.77745, Sassafras Mountain summit	MH040482
KKV	SSM075	KKV06	E. pyriformis	South Carolina: Pickens: 35.06454, -82.77745, Sassafras Mountain summit	MH040483
KKV	SSM078	KKV07	E. pyriformis	South Carolina: Pickens: 35.06454, -82.77745, Sassafras Mountain summit	MH040484
KKV	SSM078	KKV08	E. pyriformis	South Carolina: Pickens: 35.06454, -82.77745, Sassafras Mountain summit	MH040485
KKV	SSM089	KKV09	E. pyriformis	South Carolina: Greenville: Chestnut Ridge Heritage Preserve (DNR), 35.1523, -82.2814,	MH040486
KKV	SSM093	KKV10	E. pyriformis	South Carolina: Greenville: Chestnut Ridge Heritage Preserve (DNR), 35.15013, -82.28203, Chestnut Ridge Heritage Preserve (DNR)	MH040487
KKV	SSM176	KKV11	E. pyriformis	North Carolina: Macon: Nantahala National Forest, 35.07853, -83.29229, Jones Knob	MH040488
KKV	SSM176	KKV12	E. pyriformis	North Carolina: Macon: Nantahala National Forest, 35.07853, -83.29229, Jones Knob	MH040489
KKV	SSM227	KKV13	E. pyriformis	North Carolina: Jackson: Balsam Mountain Preserve, 35.398, -83.1088, BalsamMt,Dark ridge	MH040490
KKV	SSM227	KKV14	E. pyriformis	North Carolina: Jackson: Balsam Mountain Preserve, 35.398, -83.1088, BalsamMt,Dark ridge	MH040491
KKV	SSM257	KKV15	E. pyriformis	North Carolina: Macon: Nantahala National Forest, 35.00959, -83.12448, Ellicott rock trail	MH040492
KKV	SSM261	KKV16	E. pyriformis	South Carolina: Oconee: Sumter National Forest, 34.99032, -83.07233, Ellicott Rock Wilderness, Indian Camp Creek	MH040493
KKV	SSM267	KKV17	E. pyriformis	North Carolina: McDowell: Pisgah National Forest, 35.27274, -82.89323, Courthouse Falls	MH040494
KKV	SSM275	KKV18	E. pyriformis	North Carolina: McDowell: Pisgah National Forest, 35.72241, -82.17258, Mackey Mountain Trail	MH040495
KKV	SSM399	KKV19	E. pyriformis	South Carolina: Pickens: Eastatoe Creek Heritage Preserve (DNR), 35.04032, -82.81435, Eastatoe Creek Heritage Preserve trail	MH040496
KKV	SSM399	KKV20	E. pyriformis	South Carolina: Pickens: Eastatoe Creek Heritage Preserve (DNR), 35.04032, -82.81435, Eastatoe Creek Heritage Preserve trail	MH040497
KKV	SSM400	KKV21	E. pyriformis	South Carolina: Pickens: Eastatoe Creek Heritage Preserve (DNR), 35.04032, -82.81435, Eastatoe Creek Heritage Preserve trail	MH040498
KKV	SSM450	KKV22	E. pyriformis	North Carolina: Jackson: Sumter National Forest, 35.00203, -83.10708, Ellicott Rock Wilderness, Bad Creek trail	MH040499
KKV	SSM461	KKV23	E. pyriformis	North Carolina: Macoon: Ellicott Rock, 35.00959, -83.12448, Ellicott Rock	MH040500
KKV	SSM464	KKV24	E. pyriformis	South Carolina: Oconee: east fork, 34.98376, -83.09788, Ellicott Rock Wilderness	MH040501
KKV	SSM465	KKV25	E. pyriformis	South Carolina: Oconee: Coon Branch Natural Area, 35.0269, -83.0057, Coon Branch Natural Area	MH040502
KKV	SSM321	KKV26	E. pyriformis	North Carolina: McDowell: Pisgah National Forest, 35.69054, -82.20547, Snooks Nose Trail	MH040503
KKV	SSM539	KKV27	E. pyriformis	South Carolina: Greenville: Chestnut Ridge Heritage Preserve (DNR), 35.14062, -82.27904, Chestnut Ridge Heritage Preserve (DNR)	MH040504
KKV	SSM552	KKV28	E. pyriformis	North Carolina: Burke: Pisgah National Forest, , ,	MH040505
KKV	MSC2484	KKV57	E. pyriformis	South Carolina: Darlington Co., Great Pee-Dee River Preserve	MH628660
KKV	MSC2520	KKV58	E. pyriformis	Georgia: Walker Co., Lula Lake	MH628661
KKV	MSC2524	KKV60	E. pyriformis	Arkansas: Logan Co., Mt. Magazine State Park	MH628663
KKV	SSM476	KKV49	E. sordidus	Arkansas: Montogmery: Quachita National Forest, 34.3808, -94.0273,	MH040526
KKV	SSM481	KKV50	E. sordidus	Texas: Sabine: Hemphill Sabine National Forest, 31.3849, -93.7084, 0.5 mi. N. Gomer Rd.	MH040527
KKV	SSM481	KKV51	E. sordidus	Texas: Sabine: Hemphill Sabine National Forest, 31.3849, -93.7084, 0.5 mi. N. Gomer Rd.	MH040528
KKV	SSM501	KKV54	Peracalles pectoralis	Illinois: Alexander: Shawnee NF, 37.2894, -89.3427, nr. McClure	MH040531
KKV	SSM502	KKV55	Peracalles pectoralis	Illinois: Alexander: Shawnee NF, 37.2894, -89.3427, nr. McClure	MH040532

## Sheet: Sheet2
CAD	CAD_OG1
CAD	CAD_OG2
CAD	CAD_OG3
CAD	CAD_OG4
CAD	CAD_OG5
CAD	CAD_OG6
CAD	CAD01
CAD	CAD02
CAD	CAD03
CAD	CAD04
CAD	CAD05
CAD	CAD06
CAD	CAD07
CAD	CAD08
CAD	CAD09
CAD	CAD10
CAD	CAD11
CAD	CAD12
CAD	CAD13
CAD	CAD14
CAD	CAD15
CAD	CAD16
CAD	CAD17
CAD	CAD18
CAD	CAD19
CAD	CAD20
CAD	CAD21
CAD	CAD22
CAD	CAD23
CAD	CAD24
CAD	CAD25
CAD	CAD26
CAD	CAD27
CAD	CAD28
CAD	CAD29
CAD	CAD30
CAD	CAD31
CAD	CAD32
CAD	CAD33
CAD	CAD34
CAD	CAD35
CAD	CAD36
CAD	CAD37
CAD	CAD38
CAD	CAD39
CAD	CAD40
CAD	CAD41
CAD	CADp01
CAD	CADp02
CAD	CADp03
CAD	CADp04
CAD	CADp05
CAD	CADp06
CAD	CADp07
CAD	CADp08
CAD	CADp09
CAD	CADp10
CAD	CADp11
CAD	CADp12
CAD	CADp13
CAD	CADp14
CAD	CADp15
CAD	CADp16
CAD	CADp17
CAD	CADp18
CAD	CADp19
CAD	CADp20
CAD	CADp21
COI	COI_01
COI	COI_02
COI	COI_03
COI	COI_04
COI	COI_05
COI	COI_06
COI	COI_07
COI	COI_08
COI	COI_09
COI	COI_10
COI	COI_11
COI	COI_12
COI	COI_13
COI	COI_14
COI	COI_15
COI	COI_16
COI	COI_17
COI	COI_18
COI	COI_19
COI	COI_20
COI	COI_21
COI	COI_22
COI	COI_23
COI	COI_24
COI	COI_25
COI	COI_26
COI	COI_27
COI	COI_28
COI	COI_29
COI	COI_30
COI	COI_31
COI	COI_32
COI	COI_33
COI	COI_34
COI	COI_35
COI	COI_36
COI	COI_37
COI	COI_38
COI	COI_39
COI	COI_40
COI	COI_41
COI	COI_42
COI	COI_43
COI	COI_44
COI	COI_45
COI	COI_46
COI	COI_47
COI	COI_48
COI	COI_49
COI	COI_50
COI	COI_51
COI	COI_52
COI	COI_53
COI	COI_54
COI	COI_55
COI	COI_56
COI	COI_23b
COI	COI_OG1
COI	COI_OG2
COI	COI_OG3
COI	COI_OG4
COI	COI_OG5
COI	COI_OG6
COI	COI_OG7
COI	COI_OG8
COI	COI_OG9
KKV	KKV01
KKV	KKV02
KKV	KKV03
KKV	KKV04
KKV	KKV05
KKV	KKV06
KKV	KKV07
KKV	KKV08
KKV	KKV09
KKV	KKV10
KKV	KKV11
KKV	KKV12
KKV	KKV13
KKV	KKV14
KKV	KKV15
KKV	KKV16
KKV	KKV17
KKV	KKV18
KKV	KKV19
KKV	KKV20
KKV	KKV21
KKV	KKV22
KKV	KKV23
KKV	KKV24
KKV	KKV25
KKV	KKV26
KKV	KKV27
KKV	KKV28
KKV	KKV29
KKV	KKV30
KKV	KKV31
KKV	KKV32
KKV	KKV33
KKV	KKV34
KKV	KKV35
KKV	KKV36
KKV	KKV37
KKV	KKV38
KKV	KKV39
KKV	KKV40
KKV	KKV41
KKV	KKV42
KKV	KKV43
KKV	KKV44
KKV	KKV45
KKV	KKV46
KKV	KKV47
KKV	KKV48
KKV	KKV49
KKV	KKV50
KKV	KKV51
KKV	KKV52
KKV	KKV53
KKV	KKV54
KKV	KKV55
ITS2	ITS01
ITS2	ITS10
ITS2	ITS11
ITS2	ITS12
ITS2	ITS13
ITS2	ITS13
ITS2	ITS13
ITS2	ITS14
ITS2	ITS15
ITS2	ITS16
ITS2	ITS17
ITS2	ITS18
ITS2	ITS19
ITS2	ITS02
ITS2	ITS02
ITS2	ITS20
ITS2	ITS21
ITS2	ITS22
ITS2	ITS23
ITS2	ITS24
ITS2	ITS25
ITS2	ITS26
ITS2	ITS27
ITS2	ITS28
ITS2	ITS29
ITS2	ITS03
ITS2	ITS30
ITS2	ITS31
ITS2	ITS32
ITS2	ITS33
ITS2	ITS34
ITS2	ITS35
ITS2	ITS35
ITS2	ITS35
ITS2	ITS36
ITS2	ITS37
ITS2	ITS38
ITS2	ITS39
ITS2	ITS04
ITS2	ITS04
ITS2	ITS40
ITS2	ITS41
ITS2	ITS42
ITS2	ITS43
ITS2	ITS44
ITS2	ITS45
ITS2	ITS46
ITS2	ITS47
ITS2	ITS48
ITS2	ITS49
ITS2	ITS50
ITS2	ITS51
ITS2	ITS52
ITS2	ITS53
ITS2	ITS54
ITS2	ITS55
ITS2	ITS56
ITS2	ITS57
ITS2	ITS58
ITS2	ITS59
ITS2	ITS06
ITS2	ITS60
ITS2	ITS61
ITS2	ITS62
ITS2	ITS63
ITS2	ITS64
ITS2	ITS64
ITS2	ITS65
ITS2	ITS66
ITS2	ITS67
ITS2	ITS68
ITS2	ITS68
ITS2	ITS07
ITS2	ITS07
ITS2	ITS07
ITS2	ITS08
ITS2	ITS09
